# Supplementary material for: Loss-of-function mutation in PRMT9 causes abnormal synapse development by dysregulation of RNA alternative splicing
Source: PubMed Central journal article supplement (PMC10984984; doi:10.1038/s41467-024-47107-9), 2024-04-01
Supplement: 41467_2024_47107_MOESM3_ESM.pdf [file 41467_2024_47107_MOESM3_ESM.pdf]

### **Description of Additional Supplementary Information**

File Name: Supplementary Dataset 1

Description: List of proteins identified from vector control, PRMT9 WT, and PRMT9 (G189R) mutation.

File Name: Supplementary Dataset 2

Description: Oligo sequence information for primers and sgRNA.
